# Supplementary material
Source: PubMed Central journal article supplement (PMC3567871)
Supplement: supp_M112.019372_mcp.M112.019372-4.pdf [file supp_M112.019372_mcp.M112.019372-4.pdf]

**Supplementary table 4:** Significantly changed unique proteins due to STLC-induced apoptosis in one direction.

The number of queries reported in the ApoptoProteomics database (APdb) is displayed. H/L, heavy/light= control/apoptosis.

| Protein name                                                     | UniProt<br>accession | No.<br>protein<br>spots | Ratio<br>H/L<br>high | Ratio<br>H/L<br>low | APdb |
|------------------------------------------------------------------|----------------------|-------------------------|----------------------|---------------------|------|
| <b><i>Proteins with fold change &gt; 3.796 or &lt; 0.188</i></b> |                      |                         |                      |                     |      |
| 28 kDa heat- and acid-stable phosphoprotein                      | Q13442               |                         | 4.52                 |                     | 1    |
| 2-oxoisovalerate dehydrogenase subunit alpha,<br>mitochondrial   | P12694               |                         |                      | 0.05                | 0    |
| 40S ribosomal protein S3                                         | P23396               |                         |                      | 0.04                | 2    |
| 60 kDa heat shock protein, mitochondrial                         | P10809               |                         |                      | 0.02                | 9    |
| 60S ribosomal protein L13                                        | P26373               |                         | 5.07                 |                     | 1    |
| Acetyl-CoA acetyltransferase, mitochondrial                      | P24752               |                         |                      | 0.12                | 0    |
| Actin, cytoplasmic 1                                             | P60709               |                         |                      | 0.00                | 14   |
| Alcohol dehydrogenase (NADP+)                                    | P14550               |                         |                      | 0.08                | 0    |
| Alpha-aminoadipic semialdehyde synthase,<br>mitochondrial        | Q9UDR5               |                         |                      | 0.18                | 0    |
| Arrestin domain-containing protein 1                             | Q8N5I2               |                         |                      | 0.17                | 0    |

|                                                                |        |      |   |
|----------------------------------------------------------------|--------|------|---|
| Ashwin                                                         | Q9BVC5 | 0.16 | 0 |
| Calreticulin                                                   | P27797 | 0.02 | 2 |
| cAMP-dependent protein kinase type II-alpha regulatory subunit | P13861 | 6.29 | 0 |
| Cleavage stimulation factor 64 kDa subunit                     | P33240 | 4.60 | 0 |
| Creatine kinase B-type                                         | P12277 | 0.07 | 1 |
| CTP synthase 1                                                 | P17812 | 0.03 | 0 |
| Cytoplasmic protein NCK1                                       | P16333 | 3.95 | 1 |
| Cytosol aminopeptidase                                         | P28838 | 0.04 | 1 |
| DEP domain-containing mTOR-interacting protein                 | Q8TB45 | 0.16 | 0 |
| Dihydrolipoyl dehydrogenase, mitochondrial                     | P09622 | 0.05 | 0 |
| DNA-directed RNA polymerases I and III subunit RPAC1           | O15160 | 0.11 | 0 |
| DnaJ homolog subfamily C member 8                              | O75937 | 0.11 | 1 |
| Dual specificity mitogen-activated protein kinase kinase 2     | P36507 | 0.04 | 2 |
| Endophilin-A2                                                  | Q99961 | 0.11 | 0 |
| Erlin-2                                                        | O94905 | 7.52 | 1 |
| Far upstream element-binding protein 1                         | Q96AE4 | 4.30 | 7 |
| F-box-like/WD repeat-containing protein TBL1XR1                | Q9BZK7 | 0.06 | 2 |

|                                                         |        |       |   |
|---------------------------------------------------------|--------|-------|---|
| FK506-binding protein 10                                | Q96AY3 | 4.47  | 1 |
| GDH/6PGL endoplasmic bifunctional protein               | O95479 | 0.15  | 0 |
| General transcription factor IIF subunit 1              | P35269 | 0.17  | 1 |
| Glutamate dehydrogenase 1, mitochondrial                | P00367 | 0.05  | 2 |
| Glutathione reductase, mitochondrial                    | P00390 | 0.17  | 1 |
| Heterogeneous nuclear ribonucleoprotein A3              | P51991 | 6.03  | 6 |
| Heterogeneous nuclear ribonucleoprotein G               | P38159 | 0.04  | 3 |
| Histone-binding protein RBBP4                           | Q09028 | 0.02  | 2 |
| Lactotransferrin                                        | P02788 | 0.01  | 0 |
| Lamin-B2                                                | Q03252 | 0.06  | 6 |
| Leucine-rich repeat-containing protein 47               | Q8N1G4 | 4.83  | 2 |
| Lipoma-preferred partner                                | Q93052 | 10.69 | 1 |
| Liver carboxylesterase 1                                | P23141 | 0.04  | 0 |
| Moesin                                                  | P26038 | 4.40  | 2 |
| Myosin-10                                               | P35580 | 0.05  | 2 |
| Nascent polypeptide-associated complex subunit<br>alpha | Q13765 | 0.03  | 9 |
| Neural Wiskott-Aldrich syndrome protein                 | O00401 | 4.40  | 0 |
| Neuroserpin                                             | Q99574 | 0.12  | 0 |

|                                                             |        |      |   |
|-------------------------------------------------------------|--------|------|---|
| Nucleolar RNA helicase 2                                    | Q9NR30 | 0.18 | 0 |
| Nucleophosmin                                               | P06748 | 0.10 | 5 |
| Phosphoribosylformylglycinamide synthase                    | O15067 | 5.20 | 0 |
| Polyadenylate-binding protein 4                             | Q13310 | 0.08 | 4 |
| Polypyrimidine tract-binding protein 1                      | P26599 | 0.13 | 8 |
| Protein disulfide-isomerase                                 | P07237 | 0.09 | 6 |
| Protein disulfide-isomerase A3                              | P30101 | 0.03 | 9 |
| Protein disulfide-isomerase A5                              | Q14554 | 0.14 | 0 |
| Protein disulfide-isomerase A6                              | Q15084 | 0.13 | 0 |
| Protein MTO1 homolog, mitochondrial                         | Q9Y2Z2 | 0.17 | 0 |
| Protein NDRG1                                               | Q92597 | 3.95 | 1 |
| Protein NDRG3                                               | Q9UGV2 | 4.80 | 0 |
| Protein PPRC1                                               | Q96M27 | 0.07 | 0 |
| Radixin                                                     | P35241 | 5.35 | 1 |
| Regulation of nuclear pre-mRNA domain-containing protein 1B | Q9NQG5 | 0.04 | 0 |
| Regulator of chromosome condensation                        | P18754 | 0.10 | 0 |
| Replication factor C subunit 4                              | P35249 | 0.11 | 1 |
| RNA-binding protein 12                                      | Q9NTZ6 | 0.13 | 0 |

---

|                                                                        |        |       |   |
|------------------------------------------------------------------------|--------|-------|---|
| RNA-binding protein NOB1                                               | Q9ULX3 | 3.91  | 0 |
| S-adenosylmethionine synthetase isoform type-2                         | P31153 | 7.15  | 0 |
| Selenium-binding protein 1                                             | Q13228 | 0.09  | 0 |
| Septin-9                                                               | Q9UHD8 | 0.18  | 0 |
| Serpin H1                                                              | P50454 | 0.05  | 0 |
| Small glutamine-rich tetratricopeptide repeat-containing protein alpha | O43765 | 5.68  | 0 |
| Splicing factor 3B subunit 1                                           | O75533 | 4.25  | 0 |
| Splicing factor, arginine/serine-rich 3                                | P84103 | 4.49  | 1 |
| Splicing factor, arginine/serine-rich 9                                | Q13242 | 0.16  | 3 |
| Stathmin                                                               | P16949 | 26.60 | 5 |
| T-complex protein 1 subunit zeta                                       | P40227 | 4.35  | 2 |
| Transformer-2 protein homolog alpha                                    | Q13595 | 4.60  | 0 |
| Tripeptidyl-peptidase 1                                                | O14773 | 5.96  | 0 |
| Vacuolar protein sorting-associated protein 4B                         | O75351 | 0.02  | 0 |
| Xaa-Pro dipeptidase                                                    | P12955 | 0.05  | 0 |

---
